# Supplementary material
Source: PubMed Central journal article supplement (PMC5344645)
Supplement: supp_the2016-0166_onco12046-sup-0001-suppinfo1.pdf [file supp_the2016-0166_onco12046-sup-0001-suppinfo1.pdf]

Supplemental Tables for:  
 Efficacy and Safety of Folfiri Regimen in Elderly Versus non-elderly Patients with Metastatic Colorectal or Gastric Cancer  
 Jee Hyun Kim et al.

**Table S1.** Dose modification guideline

(A) Hematologic toxicities

| ANC(/mm <sup>3</sup> ) Platelet(/mm <sup>3</sup> ) | Irinotecan/5-FU                                                                                                                                                                                                                                                                                                                                                                                                          |                  |                              |          |  |         |     |           |                           |               |    |                  |                              |         |    |          |                       |
|----------------------------------------------------|--------------------------------------------------------------------------------------------------------------------------------------------------------------------------------------------------------------------------------------------------------------------------------------------------------------------------------------------------------------------------------------------------------------------------|------------------|------------------------------|----------|--|---------|-----|-----------|---------------------------|---------------|----|------------------|------------------------------|---------|----|----------|-----------------------|
| ≥ 1,500 and ≥ 100,000                              | 100% of the previous dose                                                                                                                                                                                                                                                                                                                                                                                                |                  |                              |          |  |         |     |           |                           |               |    |                  |                              |         |    |          |                       |
|                                                    | 1 week delay and CBC recheck<br>⇒ 1 week later                                                                                                                                                                                                                                                                                                                                                                           |                  |                              |          |  |         |     |           |                           |               |    |                  |                              |         |    |          |                       |
|                                                    | <table border="1"> <thead> <tr> <th>ANC</th> <th></th> <th>Platelet</th> <th></th> </tr> </thead> <tbody> <tr> <td>≥ 1,500</td> <td>and</td> <td>≥ 100,000</td> <td>100% of the previous dose</td> </tr> <tr> <td>&lt; 1,500</td> <td>or</td> <td>&lt; 100,000</td> <td>1 week delay and CBC recheck</td> </tr> </tbody> </table>                                                                                        | ANC              |                              | Platelet |  | ≥ 1,500 | and | ≥ 100,000 | 100% of the previous dose | < 1,500       | or | < 100,000        | 1 week delay and CBC recheck |         |    |          |                       |
| ANC                                                |                                                                                                                                                                                                                                                                                                                                                                                                                          | Platelet         |                              |          |  |         |     |           |                           |               |    |                  |                              |         |    |          |                       |
| ≥ 1,500                                            | and                                                                                                                                                                                                                                                                                                                                                                                                                      | ≥ 100,000        | 100% of the previous dose    |          |  |         |     |           |                           |               |    |                  |                              |         |    |          |                       |
| < 1,500                                            | or                                                                                                                                                                                                                                                                                                                                                                                                                       | < 100,000        | 1 week delay and CBC recheck |          |  |         |     |           |                           |               |    |                  |                              |         |    |          |                       |
| < 1,500 or <100,000                                | ⇒ 2 weeks later                                                                                                                                                                                                                                                                                                                                                                                                          |                  |                              |          |  |         |     |           |                           |               |    |                  |                              |         |    |          |                       |
|                                                    | <table border="1"> <thead> <tr> <th>ANC</th> <th></th> <th>Platelet</th> <th></th> </tr> </thead> <tbody> <tr> <td>≥ 1,500</td> <td>and</td> <td>≥ 100,000</td> <td>100% of the previous dose</td> </tr> <tr> <td>1,000 – 1,500</td> <td>or</td> <td>75,000 – 100,000</td> <td>-1 dose level</td> </tr> <tr> <td>&lt; 1,000</td> <td>or</td> <td>&lt; 75,000</td> <td>Stop the chemotherapy</td> </tr> </tbody> </table> | ANC              |                              | Platelet |  | ≥ 1,500 | and | ≥ 100,000 | 100% of the previous dose | 1,000 – 1,500 | or | 75,000 – 100,000 | -1 dose level                | < 1,000 | or | < 75,000 | Stop the chemotherapy |
| ANC                                                |                                                                                                                                                                                                                                                                                                                                                                                                                          | Platelet         |                              |          |  |         |     |           |                           |               |    |                  |                              |         |    |          |                       |
| ≥ 1,500                                            | and                                                                                                                                                                                                                                                                                                                                                                                                                      | ≥ 100,000        | 100% of the previous dose    |          |  |         |     |           |                           |               |    |                  |                              |         |    |          |                       |
| 1,000 – 1,500                                      | or                                                                                                                                                                                                                                                                                                                                                                                                                       | 75,000 – 100,000 | -1 dose level                |          |  |         |     |           |                           |               |    |                  |                              |         |    |          |                       |
| < 1,000                                            | or                                                                                                                                                                                                                                                                                                                                                                                                                       | < 75,000         | Stop the chemotherapy        |          |  |         |     |           |                           |               |    |                  |                              |         |    |          |                       |
| < 500 or < 25,000                                  | -1 dose level                                                                                                                                                                                                                                                                                                                                                                                                            |                  |                              |          |  |         |     |           |                           |               |    |                  |                              |         |    |          |                       |

(B) Non-hematologic toxicities

| Toxicities                             | Irinotecan                          | 5-FU                                |
|----------------------------------------|-------------------------------------|-------------------------------------|
| Nausea/vomiting (Grade 4)              | -1 dose level                       |                                     |
| Diarrhea (Grade 3 or 4)                | -1 dose level                       |                                     |
| Stomatitis (Grade 3 or 4)              | -1 dose level                       |                                     |
| Dermatologic toxicity (Grade 3 or 4)   | 100% of the previous dose           | Based on the physician's discretion |
| Neurologic toxicity (Grade 2, 3, or 4) | 100% of the previous dose           |                                     |
| Other toxicities                       | Based on the physician's discretion | Based on the physician's discretion |

Abbreviations: ANC, absolute neutrophil count; 5-FU, 5-fluorouracil; CBC, complete blood count

Supplemental Tables for:  
Efficacy and Safety of Folfiri Regimen in Elderly Versus non-elderly Patients with Metastatic Colorectal or Gastric Cancer  
Jee Hyun Kim et al.

**Table S2.** Relative dose intensity of FOLFIRI chemotherapy.

(A) CRC cohort

| Variables                                              |           | < 70 years<br>(%) | 70–74 years<br>(%) | ≥ 75 years<br>(%) | P-value |
|--------------------------------------------------------|-----------|-------------------|--------------------|-------------------|---------|
| <b>Irinotecan</b><br><b>(180 mg/m<sup>2</sup>)</b>     | Mean ± SD | 80.9 ± 14.5       | 74.5 ± 15.4        | 75.4 ± 16.3       | < 0.001 |
| <b>5-FU bolus</b><br><b>(400 mg/m<sup>2</sup>)</b>     | Mean ± SD | 84.6 ± 28.9       | 83.8 ± 31.1        | 84.1 ± 37.4       | 0.959   |
| <b>5-FU infusion</b><br><b>(2400 mg/m<sup>2</sup>)</b> | Mean ± SD | 71.8 ± 24.8       | 66.6 ± 26.0        | 50.3 ± 25.2       | < 0.001 |

(B) GC cohort

| Variables                                              |           | < 70 years<br>(%) | 70–74 years<br>(%) | ≥ 75 years<br>(%) | P-value |
|--------------------------------------------------------|-----------|-------------------|--------------------|-------------------|---------|
| <b>Irinotecan</b><br><b>(180 mg/m<sup>2</sup>)</b>     | Mean ± SD | 76.2 ± 14.3       | 72.3 ± 12.8        | 72.7 ± 15.4       | 0.060   |
| <b>5-FU bolus</b><br><b>(400 mg/m<sup>2</sup>)</b>     | Mean ± SD | 72.1 ± 54.0       | 76.2 ± 50.3        | 80.2 ± 31.7       | 0.647   |
| <b>5-FU infusion</b><br><b>(2400 mg/m<sup>2</sup>)</b> | Mean ± SD | 55.8 ± 27.1       | 43.5 ± 22.8        | 56.0 ± 27.2       | 0.002   |

Abbreviations: CRC, colorectal cancer; SD, standard deviation; 5-FU, 5-fluorouracil; GC, gastric cancer

Supplemental Tables for:  
Efficacy and Safety of Folfiri Regimen in Elderly Versus non-elderly Patients with Metastatic Colorectal or Gastric Cancer  
Jee Hyun Kim et al.

**Table S3.** Treatment response to FOLFIRI chemotherapy

(A) CRC cohort

| <b>Response (%)</b> | <b>&lt; 70 years (N = 687)</b> | <b>≥ 70 years (N=128)</b> | <b>P-value</b> |
|---------------------|--------------------------------|---------------------------|----------------|
| CR                  | 13 (1.9)                       | 1 (0.8)                   |                |
| PR                  | 156 (22.7)                     | 28 (21.9)                 |                |
| SD                  | 376 (54.7)                     | 74 (57.8)                 |                |
| PD                  | 142 (20.7)                     | 25 (19.5)                 |                |
| RR                  | 169 (24.6)                     | 29 (22.7)                 | 0.720          |

(B) GC cohort

| <b>Response (%)</b> | <b>&lt; 70 years (N = 438)</b> | <b>≥ 70 years (N = 70)</b> | <b>P-value</b> |
|---------------------|--------------------------------|----------------------------|----------------|
| CR                  | 11 (2.5)                       | 1 (1.43)                   |                |
| PR                  | 54 (12.3)                      | 11 (15.7)                  |                |
| SD                  | 234 (53.4)                     | 35 (50.0)                  |                |
| PD                  | 139 (31.7)                     | 23 (32.9)                  |                |
| RR                  | 65 (14.8)                      | 12 (17.1)                  | 0.749          |

Abbreviations: CRC, colorectal cancer; CR, complete remission; PR, partial response; SD, stable disease; PD, progressive disease; RR, response rate; GC, gastric cancer

Supplemental Tables for:  
Efficacy and Safety of Folfiri Regimen in Elderly Versus non-elderly Patients with Metastatic Colorectal or Gastric Cancer  
Jee Hyun Kim et al.

**Table S4.** Multivariable analysis of PFS in the CRC and GC cohorts

(A) Multivariable analysis of PFS in the CRC cohort

| Characteristics                      |            | HR (95% CI)         | P-value |
|--------------------------------------|------------|---------------------|---------|
| <i>UGT1A1</i><br>genotype            | 0DA        | 1                   | 0.229   |
|                                      | 1DA        | 1.095 (0.945–1.268) |         |
|                                      | 2DA        | 1.200 (0.953–1.511) |         |
| Liver metastasis                     | No         | 1                   | < 0.001 |
|                                      | Yes        | 1.414 (1.215–1.647) |         |
| Lung metastasis                      | No         | 1                   | 0.152   |
|                                      | Yes        | 1.119 (0.959–1.306) |         |
| Lymph node<br>metastasis             | No         | 1                   | 0.006   |
|                                      | Yes        | 1.243 (1.064–1.453) |         |
| Peritoneal<br>metastasis             | No         | 1                   | 0.066   |
|                                      | Yes        | 1.206 (0.988–1.472) |         |
| Previous<br>adjuvant<br>chemotherapy | No         | 1                   | 0.010   |
|                                      | Yes        | 0.811 (0.691–0.952) |         |
| Treatment line                       | 1st-line   | 1                   | < 0.001 |
|                                      | 2nd-line   | 1.354 (1.168–1.569) |         |
| Age                                  | < 70 years | 1                   | 0.244   |
|                                      | ≥ 70 years | 1.117 (0.927–1.345) |         |

Supplemental Tables for:  
Efficacy and Safety of Folfiri Regimen in Elderly Versus non-elderly Patients with Metastatic Colorectal or Gastric Cancer  
Jee Hyun Kim et al.

(B) Multivariable analysis of OS in the CRC cohort

| Characteristics                |            | HR (95% CI)         | P-value |
|--------------------------------|------------|---------------------|---------|
| <i>UGT1A1</i> genotype         | 0DA        | 1                   | 0.662   |
|                                | 1DA        | 0.922 (0.764–1.112) |         |
|                                | 2DA        | 1.007 (0.750–1.352) |         |
| Liver metastasis               | No         | 1                   | < 0.001 |
|                                | Yes        | 1.540 (1.264–1.877) |         |
| Lung metastasis                | No         | 1                   | 0.982   |
|                                | Yes        | 1.002 (0.821–1.223) |         |
| Lymph node metastasis          | No         | 1                   | < 0.001 |
|                                | Yes        | 1.582 (1.301–1.923) |         |
| Peritoneal metastasis          | No         | 1                   | 0.015   |
|                                | Yes        | 1.373 (1.064–1.773) |         |
| Previous adjuvant chemotherapy | No         | 1                   | < 0.001 |
|                                | Yes        | 0.679 (0.551–0.839) |         |
| Treatment line                 | 1st-line   | 1                   | < 0.001 |
|                                | 2nd-line   | 1.440 (1.196–1.733) |         |
| Age                            | < 70 years | 1                   | 0.931   |
|                                | ≥ 70 years | 0.989 (0.774–1.264) |         |

(C) Multivariable analysis of PFS in the GC cohort

| Characteristics                |            | HR (95% CI)        | P-value |
|--------------------------------|------------|--------------------|---------|
| <i>UGT1A1</i> genotype         | 0DA        | 1                  | 0.099   |
|                                | 1DA        | 1.101(0.917–1.322) |         |
|                                | 2DA        | 0.791(0.587–1.067) |         |
| Liver metastasis               | No         | 1                  | 0.005   |
|                                | Yes        | 1.336(1.090–1.638) |         |
| Lung metastasis                | No         | 1                  | 0.054   |
|                                | Yes        | 1.382(0.995–1.920) |         |
| Lymph node metastasis          | No         | 1                  | 0.520   |
|                                | Yes        | 0.942(0.784–1.131) |         |
| Peritoneal metastasis          | No         | 1                  | 0.001   |
|                                | Yes        | 1.377(1.131–1.676) |         |
| Previous adjuvant chemotherapy | No         | 1                  | 0.016   |
|                                | Yes        | 0.788(0.650–0.956) |         |
| Treatment line                 | 1st-line   | 1                  | < 0.001 |
|                                | 2nd-line   | 1.549(1.287–1.865) |         |
| Age                            | < 70 years | 1                  | 0.479   |
|                                | ≥ 70 years | 1.093(0.854–1.400) |         |

Supplemental Tables for:  
Efficacy and Safety of Folfiri Regimen in Elderly Versus non-elderly Patients with Metastatic Colorectal or Gastric Cancer  
Jee Hyun Kim et al.

(D) Multivariable analysis of OS in the GC cohort

| Characteristics                |            | HR (95% CI)         | P-value |
|--------------------------------|------------|---------------------|---------|
| <i>UGT1A1</i> genotype         | 0DA        | 1                   | 0.323   |
|                                | 1DA        | 1.107 (0.894–1.370) |         |
|                                | 2DA        | 0.839 (0.572–1.230) |         |
| Liver metastasis               | No         | 1                   | 0.036   |
|                                | Yes        | 1.293 (1.017–1.645) |         |
| Lung metastasis                | No         | 1                   | 0.118   |
|                                | Yes        | 1.351 (0.927–1.969) |         |
| Lymph node metastasis          | No         | 1                   | 0.281   |
|                                | Yes        | 1.126 (0.908–1.395) |         |
| Peritoneal metastasis          | No         | 1                   | 0.003   |
|                                | Yes        | 1.429 (1.131–1.805) |         |
| Previous adjuvant chemotherapy | No         | 1                   | < 0.001 |
|                                | Yes        | 0.625 (0.493–0.794) |         |
| Treatment line                 | 1st-line   | 1                   | 0.026   |
|                                | 2nd-line   | 1.284 (1.030–1.600) |         |
| Age                            | < 70 years | 1                   | 0.241   |
|                                | ≥ 70 years | 1.188 (0.891–1.585) |         |

Abbreviations: PFS, progression-free survival; CRC, colorectal cancer; GC, gastric cancer; HR, hazard ratio; CI, confidence interval; DA, defective allele; OS, overall survival

Supplemental Tables for:  
Efficacy and Safety of Folfiri Regimen in Elderly Versus non-elderly Patients with Metastatic Colorectal or Gastric Cancer  
Jee Hyun Kim et al.

**Table S5.** Treatment-related toxicity per treatment cycle

(A) CRC cohort

| Variables               |            | < 70 years<br>(N = 6,057) | 70–74 years<br>(N = 779) | ≥ 75 years<br>(N = 291) | P-value |
|-------------------------|------------|---------------------------|--------------------------|-------------------------|---------|
| Neutropenia (%)         | All grades | 3,195 (52.7)              | 411 (52.7)               | 159 (54.6)              | 0.819   |
|                         | Grade ≥ 2  | 2,018 (33.3)              | 268 (34.4)               | 113 (38.8)              | 0.136   |
|                         | Grade ≥ 3  | 922 (15.2)                | 124 (15.9)               | 64 (22.0)               | 0.007   |
| Febrile neutropenia (%) | Grade ≥ 3  | 22 (0.4)                  | 5 (0.6)                  | 2 (0.6)                 | 0.385   |
| Asthenia (%)            | All grades | 1,028 (17.0)              | 153 (19.6)               | 53 (18.2)               | 0.165   |
|                         | Grade ≥ 2  | 128 (2.1)                 | 22 (2.8)                 | 16 (5.5)                | 0.001   |
|                         | Grade ≥ 3  | 13 (0.2)                  | 11 (1.4)                 | 3 (1.0)                 | < 0.001 |
| Mucositis (%)           | All grades | 565 (9.3)                 | 95 (12.1)                | 31 (10.7)               | 0.033   |
|                         | Grade ≥ 2  | 75 (1.2)                  | 21 (2.7)                 | 14 (4.8)                | < 0.001 |
|                         | Grade ≥ 3  | 4 (0.1)                   | 2 (0.3)                  | 2 (0.7)                 | 0.010   |
| Anorexia (%)            | All grades | 930 (15.4)                | 144 (18.5)               | 85 (29.2)               | < 0.001 |
|                         | Grade ≥ 2  | 135 (2.2)                 | 39 (5.0)                 | 29 (10.0)               | < 0.001 |
|                         | Grade ≥ 3  | 15 (0.2)                  | 7 (0.9)                  | 2 (0.7)                 | 0.010   |
| Nausea (%)              | All grades | 977 (16.1)                | 90 (11.6)                | 47 (16.2)               | 0.004   |
|                         | Grade ≥ 2  | 149 (2.5)                 | 26 (3.3)                 | 9 (3.1)                 | 0.297   |
|                         | Grade ≥ 3  | 31 (0.5)                  | 4 (0.5)                  | 0 (0)                   | 0.641   |
| Vomiting (%)            | All grades | 265 (4.4)                 | 10 (1.3)                 | 16 (5.5)                | < 0.001 |
|                         | Grade ≥ 2  | 88 (1.5)                  | 5 (0.6)                  | 2 (0.6)                 | 0.136   |
|                         | Grade ≥ 3  | 26 (0.4)                  | 3 (0.4)                  | 0 (0)                   | 0.765   |
| Diarrhea (%)            | All grades | 575 (9.5)                 | 84 (10.8)                | 28 (9.6)                | 0.517   |
|                         | Grade ≥ 2  | 169 (2.8)                 | 36 (4.6)                 | 8 (2.7)                 | 0.018   |
|                         | Grade ≥ 3  | 51 (0.8)                  | 8 (1.0)                  | 3 (1.0)                 | 0.683   |
| Constipation (%)        | All grades | 429 (7.1)                 | 40 (5.1)                 | 28 (9.6)                | 0.026   |
|                         | Grade ≥ 2  | 66 (1.1)                  | 5 (0.6)                  | 2 (0.7)                 | 0.522   |
|                         | Grade ≥ 3  | 6 (0.1)                   | 0 (0)                    | 0 (0)                   | 1.000   |

Supplemental Tables for:  
Efficacy and Safety of Folfiri Regimen in Elderly Versus non-elderly Patients with Metastatic Colorectal or Gastric Cancer  
Jee Hyun Kim et al.

(B) GC cohort

| Variables               |            | < 70 years<br>(N = 3,147) | 70–74 years<br>(N = 345) | ≥ 75 years<br>(N = 111) | P-value |
|-------------------------|------------|---------------------------|--------------------------|-------------------------|---------|
| Neutropenia (%)         | All grades | 1,592 (50.6)              | 176 (51.0)               | 54 (48.6)               | 0.909   |
|                         | Grade ≥ 2  | 1,000 (31.8)              | 114 (33.0)               | 35 (31.5)               | 0.888   |
|                         | Grade ≥ 3  | 545 (17.3)                | 70 (20.3)                | 16(14.4)                | 0.264   |
| Febrile neutropenia (%) | Grade ≥ 3  | 21 (0.7)                  | 4 (1.2)                  | 1 (0.9)                 | 0.576   |
| Asthenia (%)            | All grades | 701 (22.3)                | 72 (20.9)                | 39 (35.1)               | 0.005   |
|                         | Grade ≥ 2  | 153 (4.9)                 | 23 (6.7)                 | 13 (11.7)               | 0.003   |
|                         | Grade ≥ 3  | 18 (0.6)                  | 2 (0.6)                  | 3 (2.7)                 | < 0.001 |
| Mucositis (%)           | All grades | 484 (15.4)                | 48 (13.9)                | 13 (11.7)               | 0.458   |
|                         | Grade ≥ 2  | 64 (2.0)                  | 6 (1.7)                  | 3 (2.7)                 | 0.819   |
|                         | Grade ≥ 3  | 7 (0.2)                   | 0 (0)                    | 1 (1.0)                 | 0.250   |
| Anorexia (%)            | All grades | 911 (28.9)                | 84 (24.3)                | 34 (30.6)               | 0.177   |
|                         | Grade ≥ 2  | 306 (9.7)                 | 33 (9.6)                 | 9 (8.1)                 | 0.850   |
|                         | Grade ≥ 3  | 37 (1.2)                  | 3 (0.9)                  | 2 (1.8)                 | 0.589   |
| Nausea (%)              | All grades | 824 (26.2)                | 69 (20.0)                | 25 (22.5)               | 0.034   |
|                         | Grade ≥ 2  | 245 (7.8)                 | 13 (3.8)                 | 2 (1.8)                 | 0.002   |
|                         | Grade ≥ 3  | 67 (2.1)                  | 5 (1.4)                  | 0 (0)                   | 0.268   |
| Vomiting (%)            | All grades | 334 (10.6)                | 22 (6.4)                 | 7 (6.3)                 | 0.019   |
|                         | Grade ≥ 2  | 138 (4.4)                 | 9 (2.6)                  | 1 (1.0)                 | 0.066   |
|                         | Grade ≥ 3  | 31 (1.0)                  | 3 (0.9)                  | 0 (0)                   | 0.913   |
| Diarrhea (%)            | All grades | 343 (10.9)                | 34 (9.9)                 | 9 (8.1)                 | 0.558   |
|                         | Grade ≥ 2  | 52 (1.7)                  | 3 (0.9)                  | 2 (1.8)                 | 0.599   |
|                         | Grade ≥ 3  | 14 (0.4)                  | 0 (0)                    | 0 (0)                   | < 0.001 |
| Constipation (%)        | All grades | 157 (5.0)                 | 18 (5.2)                 | 7 (6.3)                 | 0.815   |
|                         | Grade ≥ 2  | 35 (1.1)                  | 4 (1.2)                  | 0 (0)                   | 0.784   |
|                         | Grade ≥ 3  | 5 (0.2)                   | 0 (0)                    | 0 (0)                   | 1.000   |

Abbreviations: CRC, colorectal cancer; GC, gastric cancer
